# Supplementary material
Source: PubMed Central journal article supplement (PMC3542470)
Supplement: mmc1.pdf [file mmc1.pdf]

## Supplemental Data

### Meta-Analysis Followed by Replication Identifies Loci

### in or near *CDKN1B*, *TET3*, *CD80*, *DRAM1*, and *ARID5B*

### as Associated with Systemic Lupus Erythematosus in Asians

Wanling Yang, Huayang Tang, Yan Zhang, Xianfa Tang, Jing Zhang, Liangdan Sun, Jing Yang, Yong Cui, Lu Zhang, Nattiya Hirankarn, Hui Cheng, Hai-Feng Pan, Jinping Gao, Tsz Leung Lee, Yujun Sheng, Chak Sing Lau, Yang Li, Tak Mao Chan, Xianyong Yin, Dingge Ying, Qianjin Lu, Alexander Moon Ho Leung, Xianbo Zuo, Xiang Chen, Kwok Lung Tong, Fusheng Zhou, Qingchun Diao, Niko Kei Chiu Tse, Hongfu Xie, Chi Chiu Mok, Fei Hao, Sik Nin Wong, Bingjun Shi, Ka Wing Lee, Yan Hui, Marco Hok Kung Ho, Bo Liang, Pamela Pui Wah Lee, Hongzhou Cui, Qing Guo, Brian Hon-Yin Chung, Xiongming Pu, Qiji Liu, Xiaoguang Zhang, Change Zhang, Chun Yin Chong, Hong Fang, Raymond Woon Sing Wong, Yonghu Sun, Mo Yin Mok, Xiang-Pei Li, Yingyos Avihingsanon, Zhifang Zhai, Pornpimol Rianthavorn, Thavatchai Deekajorndej, Kanya Suphapeetiporn, Fei Gao, Vorasuk Shotelersuk, Xiaojing Kang, Shirley King Yee Ying, Lijuan Zhang, Wilfred Hing Sang Wong, Dingxian Zhu, Samuel Ka Shun Fung, Fanqin Zeng, Wai Ming Lai, Chun-Ming Wong, Irene Oi Lin Ng, Maria-Mercè Garcia-Barceló, Stacey S. Cherny, Nan Shen, Paul Kwong-Hang Tam, Pak Chung Sham, Dong-Qing Ye, Sen Yang, Xue-Jun Zhang, and Yu Lung Lau

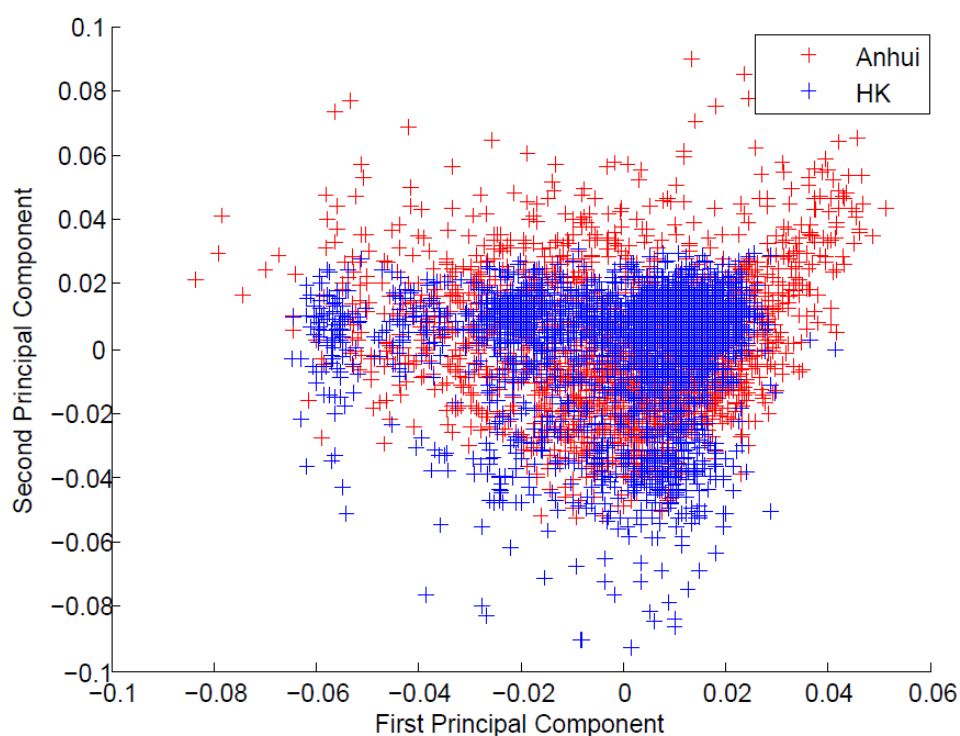

**Figure S1. Population Substructure Analysis on the Samples from Hong Kong and Anhui in the GWAS Stage by Principal Component Analysis Using Eigenstrat**

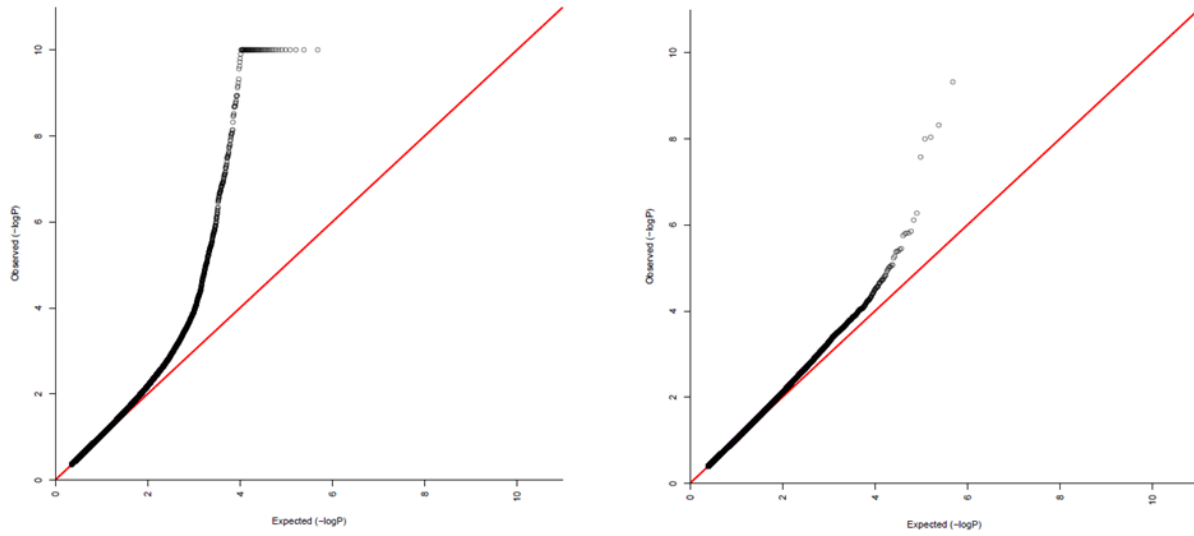

**Figure S2. Q-Q Plot of the Meta-analysis Results**

Left panel: Q-Q plot based on all the SNPs from GWAS that passed QC.

Right panel, Q-Q plot on the remaining SNPs after the removal of SNPs in the established susceptibility gene and within 100 Kb up- and down-stream of those genes. These genes include *ATG5*, *BANK1*, *BLK*, *ELF1*, *ETS1*, *HIC2*, *IKZF1*, *IRF5*, *LRRC18*, *PRDM1*, *RASGRP3*, *SLC15A4*, *STAT4*, *TNFAIP3*, *TNFSF4*, *TNIP1*, *UBE2L3*, *WDFY4* and the *HLA* region.

A

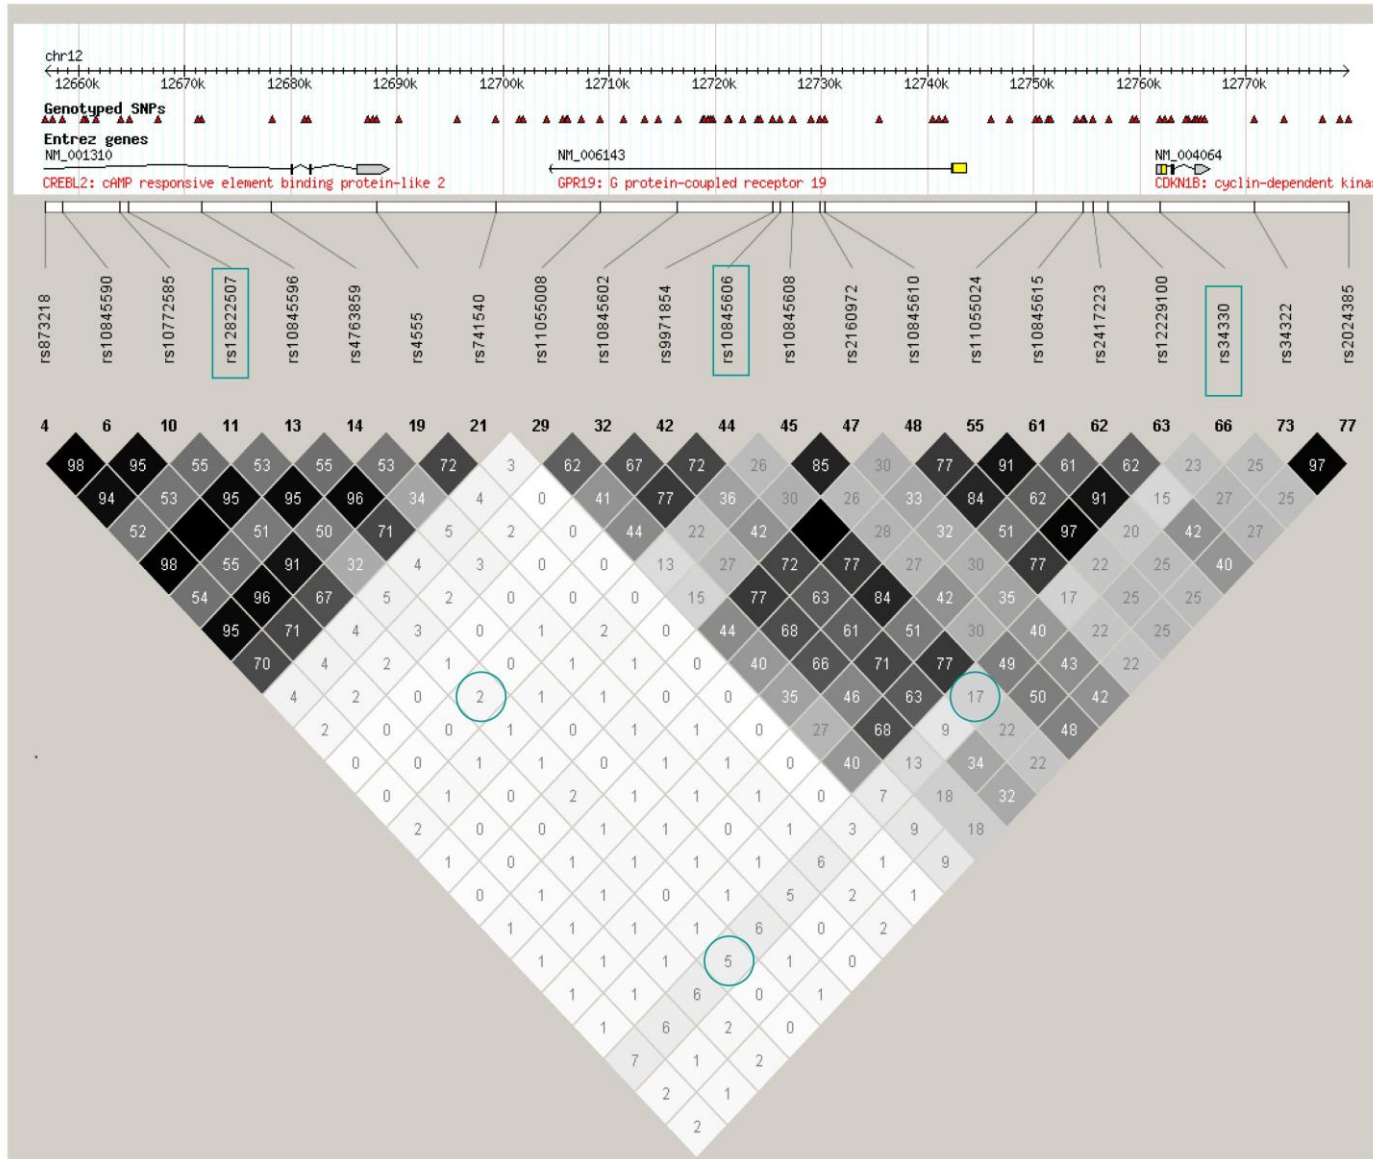

**B**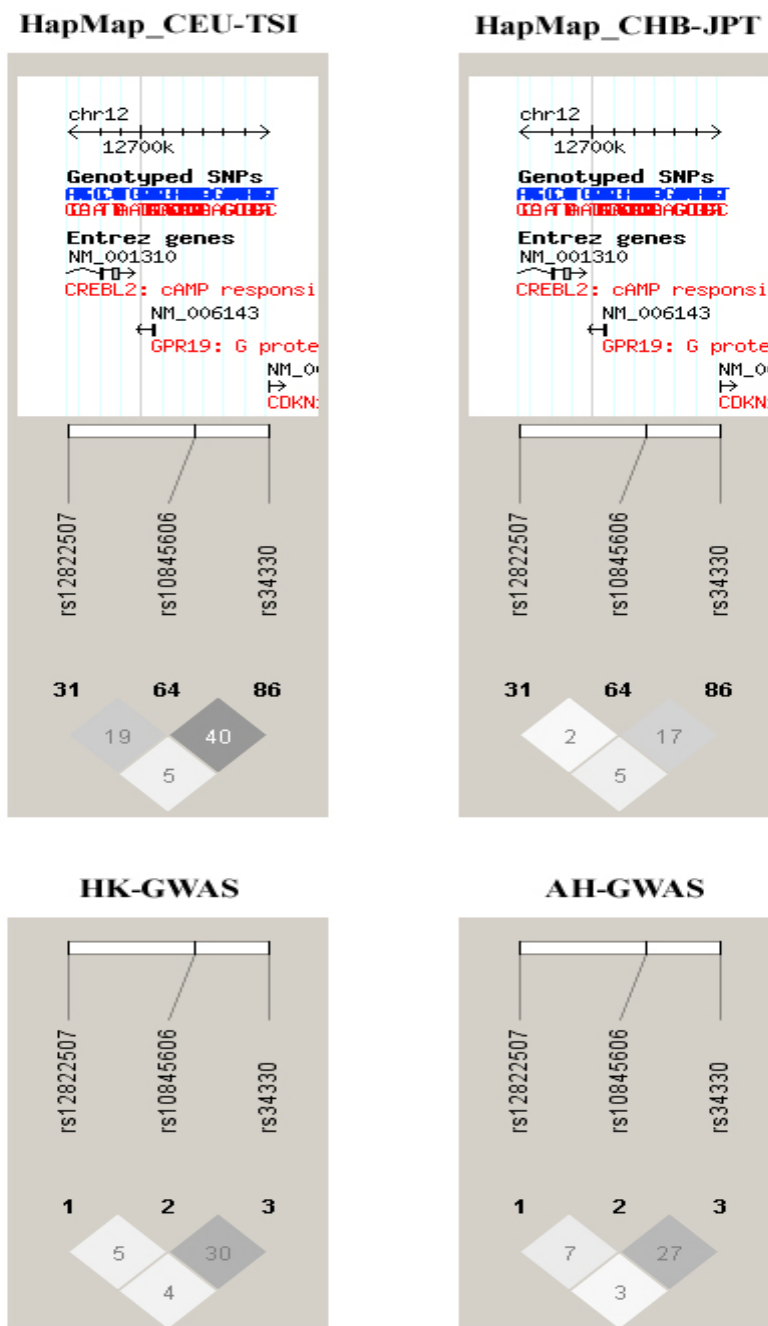

**Figure S3. Lack of High LD among the Three SNPs in the 12p13 Locus Found to be Associated with SLE in This Study**

(A) LD for 12p13 region based on data from HapMap CHB and JPT. All the numbers in the figure are pair-wise  $r^2$  values. The three SNPs validated in this study were bracketed and the LD among them are circled. It seems that a recombination hotspot exists between rs12822507 and the other two SNPs, rs10845606 and rs34330. The  $r^2$  value between the latter two SNPs is 0.17 in Asians.

(B) LD ( $r^2$ ) between the three identified SNPs in the 12p13 region based on HapMap and GWAS data.

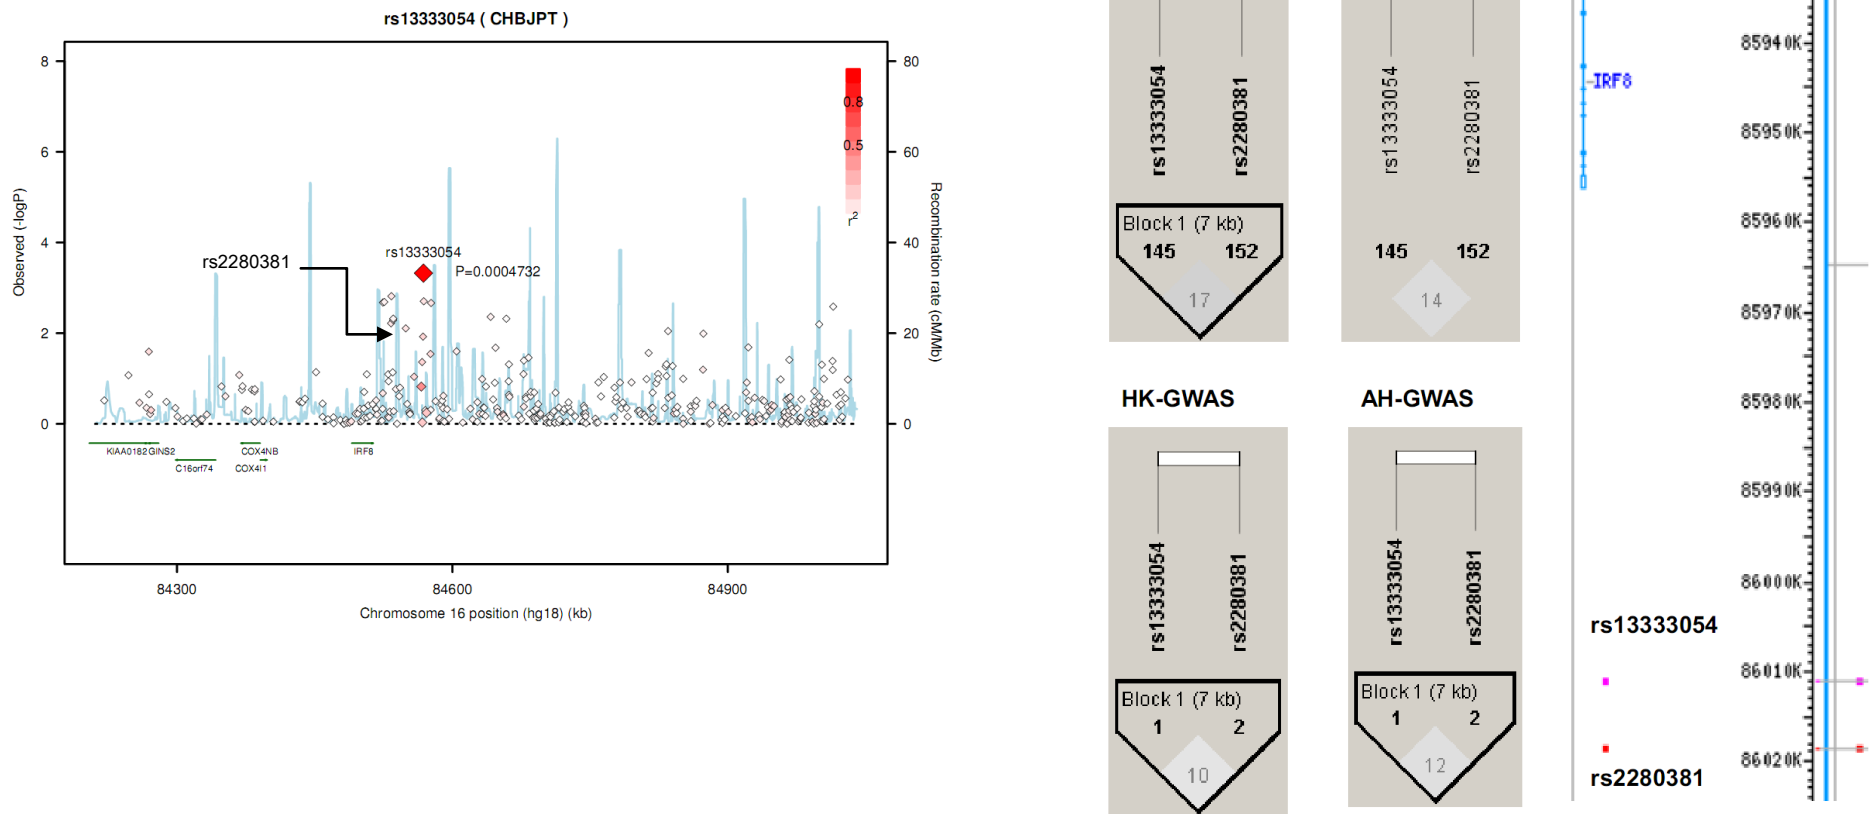

**Figure S4. LD between rs13333054 Identified in This Study and rs2280381 Reported in a European Study on SLE in the *IRF8* Locus**

(Left panel) Regional association plots show association from meta-analysis ( $-\log_{10}(p_{meta})$ ) versus chromosomal position (Kb) for all the SNPs in a 500 kb region centered on rs13333054.  $p_{meta}$  values are plotted for all SNPs shaded white to red by the degree of LD ( $r^2$ ; see insets) with rs13333054. Local recombination rates estimated from HapMap CHB-JPT (cM/Mb, blue lines) are plotted against the secondary y axis, showing recombination hotspots across the region and haplotype blocks in between.

(Right panel) LD between rs13333054 and rs2280381 in different cohorts and the relative positions of the two SNPs and their position relative to gene *IRF8* shown in MapViewer. There is minimal LD between the two SNPs in both Europeans and Asians. Association from rs2280381 is likely dependent on that of rs13333054 in Asian populations.

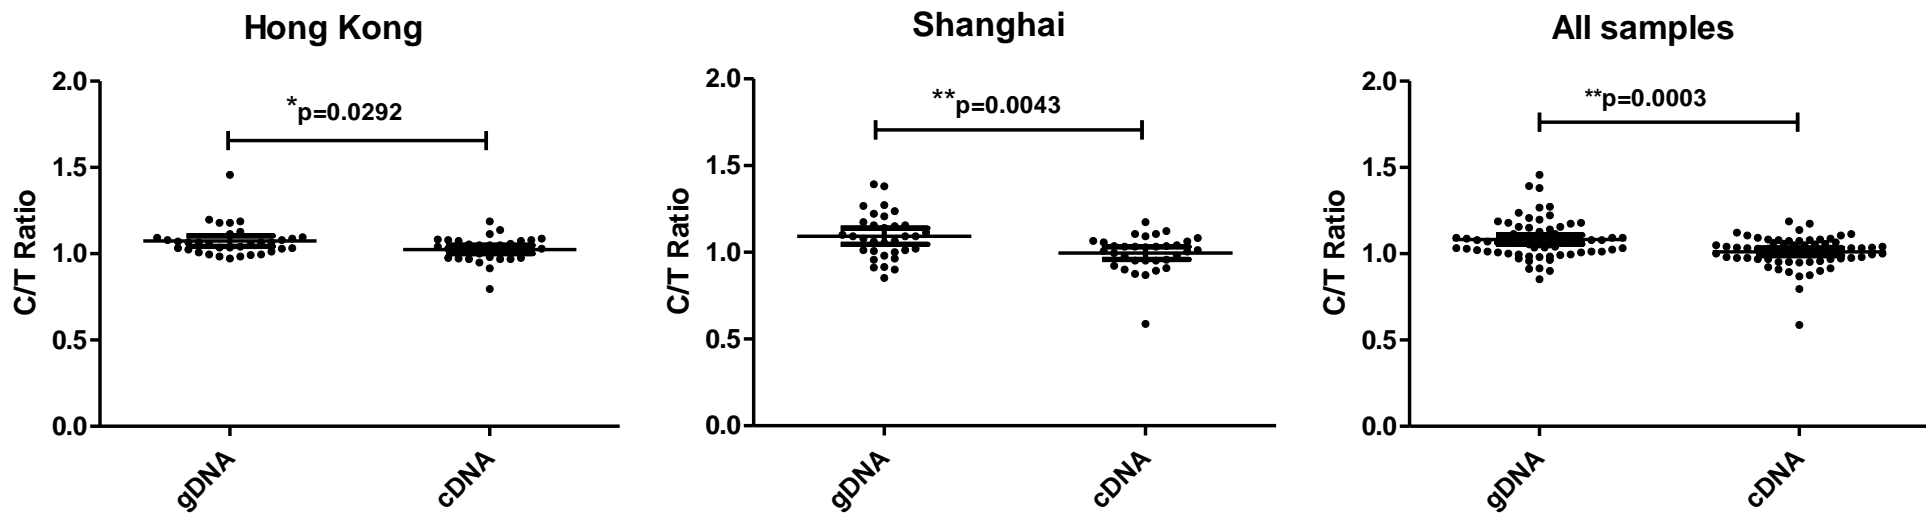

**Figure S5. Allelic Expression of *CDKN1B* for SNP rs34330 in PBMC of Healthy Controls**

PBMC cDNA from 67 healthy individuals heterozygous on rs34330 were used for allelic expression comparison of *CDKN1B* by pyrosequencing. The ratio of C/T allelic expression was detected using both DNA and cDNA for each sample.

Two cohorts were used in this assay. The first cohort contains 34 Hong Kong healthy controls and the experiment was conducted in Hong Kong (left panel). The median C/T ratio for DNA was measured at 1.060 (95% CI: 1.042–1.105) and the median C/T ratio for cDNA was 1.028 (95% CI: 1.000–1.049). A small but significant difference was observed ( $P = 0.0292$ ) when comparing the two ratios using paired student's *t* test.

(Central panel) A second cohort ( $n=33$ ), also samples of healthy individuals from Hong Kong, was sent for testing in Shanghai (Joint Molecular Rheumatology Laboratory of the Institute of Health Sciences and Shanghai Renji Hospital, Chinese Academy of Sciences and Shanghai Jiaotong University, Shanghai, China). The median C/T ratio for DNA was measured at 1.092 (95% CI: 1.046–1.139) and the median C/T ratio for cDNA expression was 1.012 (95% CI: 0.9587–1.033), and  $P = 0.0043$  by paired student's *t* test.

If all the healthy individuals heterozygous on rs34330 ( $n = 67$ ) were pooled together (right panel), the median C/T ratio for DNA was 1.066 (95% CI: 1.055–1.110) and the median C/T ratio for cDNA was 1.028 (95% CI: 0.9887–1.032) and  $P = 0.0003$  by paired student's *t* test. It seems that the risk allele C is corresponding to a relatively lower expression of *CDKN1B* in PBMC of the healthy controls.

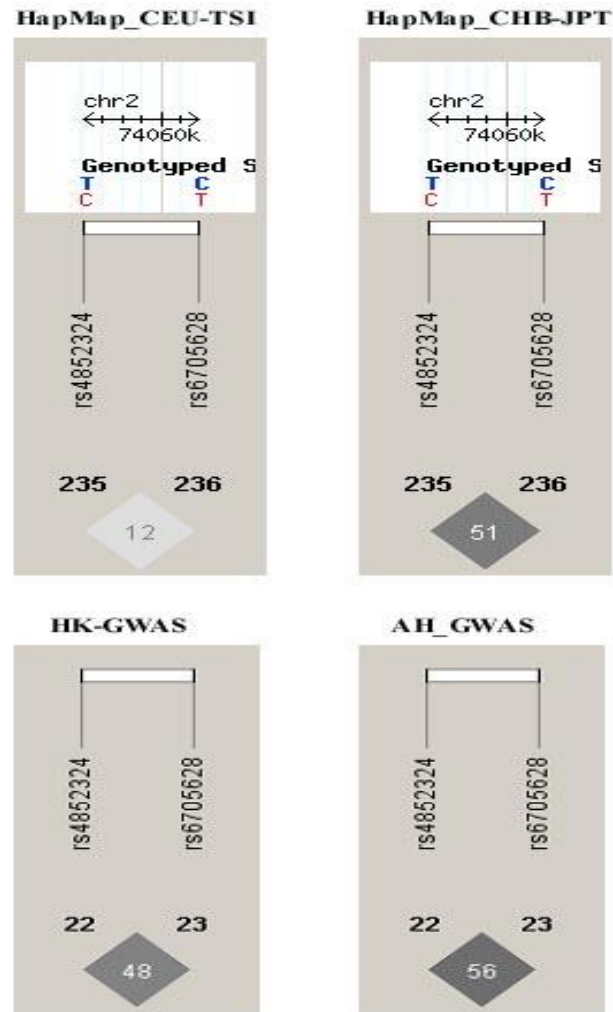

Figure S6. LD between rs4852324 and rs6705628 in the *DGUOK/TET3* Region

**Table S1. Meta-analysis Results on Reported Susceptibility Loci ( $p_{\text{meta}} < 1\text{E-}4$ )**

| SNP           | Genes                    | A1/A2 | Hong Kong GWAS Results |          |      |         | Anhui GWAS Results |          |      |         | Meta-analysis     |
|---------------|--------------------------|-------|------------------------|----------|------|---------|--------------------|----------|------|---------|-------------------|
|               |                          |       | Cases                  | Controls | OR   | p       | Cases              | Controls | OR   | p       | $p_{\text{meta}}$ |
| rs4522865*    |                          | G/A   | 0.39                   | 0.46     | 0.74 | 6.2E-06 | 0.35               | 0.39     | 0.87 | 2.6E-02 | 5.0E-06           |
| rs4276281     |                          | C/A   | 0.53                   | 0.47     | 1.25 | 4.7E-04 | 0.43               | 0.40     | 1.14 | 2.9E-02 | 1.1E-04           |
| rs10516487*** | <i>BANK1</i>             | T/C   | 0.15                   | 0.19     | 0.74 | 6.1E-04 | 0.11               | 0.14     | 0.82 | 2.6E-02 | 1.2E-04           |
| rs10516486    |                          | G/A   | 0.53                   | 0.47     | 1.25 | 6.0E-04 | 0.43               | 0.40     | 1.14 | 3.3E-02 | 1.6E-04           |
| rs13129744    |                          | C/T   | 0.16                   | 0.20     | 0.75 | 7.5E-04 | 0.12               | 0.14     | 0.84 | 5.4E-02 | 3.2E-04           |
| rs2254546     |                          | A/G   | 0.20                   | 0.27     | 0.67 | 6.5E-07 | 0.17               | 0.25     | 0.65 | 7.6E-09 | 1.5E-13           |
| rs7812879     |                          | T/C   | 0.20                   | 0.27     | 0.69 | 2.3E-06 | 0.17               | 0.25     | 0.65 | 5.0E-09 | 3.4E-13           |
| rs1564267     | <i>BLK</i>               | T/C   | 0.20                   | 0.27     | 0.69 | 2.5E-06 | 0.18               | 0.25     | 0.65 | 4.5E-09 | 3.5E-13           |
| rs13277113*   |                          | G/A   | 0.23                   | 0.30     | 0.69 | 6.6E-07 | 0.22               | 0.29     | 0.69 | 6.9E-08 | 1.1E-12           |
| rs2736340***  |                          | C/T   | 0.22                   | 0.29     | 0.69 | 7.6E-07 | 0.20               | 0.27     | 0.69 | 1.9E-07 | 3.3E-12           |
| rs9270984     |                          | T/G   | 0.28                   | 0.18     | 1.73 | 1.3E-13 | 0.25               | 0.16     | 1.73 | 1.9E-13 | 4.6E-24           |
| rs9271055     |                          | G/T   | 0.28                   | 0.18     | 1.73 | 1.6E-13 | 0.25               | 0.16     | 1.73 | 2.5E-13 | 7.4E-24           |
| rs9271100     | <i>HLA-DRB1</i>          | T/C   | 0.29                   | 0.19     | 1.69 | 7.9E-13 | 0.27               | 0.18     | 1.68 | 8.5E-13 | 1.0E-22           |
| rs9271366***  |                          | G/A   | 0.21                   | 0.14     | 1.67 | 4.3E-10 | 0.21               | 0.14     | 1.67 | 8.1E-11 | 2.4E-18           |
| rs660895      |                          | G/A   | 0.19                   | 0.26     | 0.68 | 9.4E-07 | 0.15               | 0.22     | 0.63 | 4.4E-09 | 1.3E-13           |
| rs10276619    |                          | A/G   | 0.33                   | 0.37     | 0.85 | 1.7E-02 | 0.33               | 0.39     | 0.77 | 3.3E-05 | 5.9E-06           |
| rs4917014**   | <i>IKZF1<sup>a</sup></i> | G/T   | 0.26                   | 0.29     | 0.86 | 3.7E-02 | 0.26               | 0.32     | 0.75 | 1.0E-05 | 6.7E-06           |
| rs11761913    |                          | T/C   | 0.07                   | 0.10     | 0.66 | 7.3E-04 | 0.09               | 0.11     | 0.74 | 2.8E-03 | 1.4E-05           |
| rs12669163    |                          | A/C   | 0.32                   | 0.35     | 0.88 | 6.5E-02 | 0.28               | 0.34     | 0.78 | 1.8E-04 | 1.0E-04           |



|              |                               |     |      |      |      |         |      |      |      |         |         |
|--------------|-------------------------------|-----|------|------|------|---------|------|------|------|---------|---------|
| rs1456893    |                               | A/G | 0.32 | 0.35 | 0.88 | 7.2E-02 | 0.28 | 0.34 | 0.78 | 1.5E-04 | 1.1E-04 |
| rs960633     |                               | T/G | 0.14 | 0.12 | 1.22 | 4.0E-02 | 0.13 | 0.11 | 1.24 | 1.8E-02 | 2.3E-03 |
| rs729302     | <i>IRF5</i>                   | C/A | 0.26 | 0.34 | 0.68 | 1.6E-07 | 0.29 | 0.34 | 0.79 | 2.3E-04 | 1.2E-09 |
| rs4728142*** |                               | A/G | 0.18 | 0.13 | 1.51 | 1.9E-06 | 0.18 | 0.14 | 1.38 | 9.0E-05 | 3.0E-09 |
| rs2231241    |                               | T/C | 0.12 | 0.09 | 1.42 | 4.7E-04 | 0.07 | 0.06 | 1.32 | 2.3E-02 | 8.8E-05 |
| rs11811536   |                               | A/C | 0.12 | 0.09 | 1.42 | 5.0E-04 | 0.07 | 0.06 | 1.31 | 2.7E-02 | 1.1E-04 |
| rs2296164    | <i>NCF2<sup>b</sup></i>       | G/A | 0.41 | 0.39 | 1.06 | 4.1E-01 | 0.42 | 0.38 | 1.20 | 2.4E-03 | 6.9E-03 |
| rs2274064    |                               | A/G | 0.39 | 0.38 | 1.03 | 6.4E-01 | 0.42 | 0.37 | 1.21 | 1.5E-03 | 1.1E-02 |
| rs3845466    |                               | A/G | 0.27 | 0.26 | 1.08 | 3.0E-01 | 0.25 | 0.22 | 1.16 | 3.3E-02 | 2.8E-02 |
| rs742108     |                               | T/C | 0.39 | 0.34 | 1.24 | 1.1E-03 | 0.36 | 0.32 | 1.24 | 5.6E-04 | 4.0E-06 |
| rs548234**   |                               | C/T | 0.33 | 0.29 | 1.22 | 4.3E-03 | 0.32 | 0.27 | 1.28 | 1.7E-04 | 5.2E-06 |
| rs6568431    | <i>PRDM1-ATG5<sup>c</sup></i> | A/C | 0.41 | 0.36 | 1.24 | 1.2E-03 | 0.38 | 0.33 | 1.23 | 8.5E-04 | 6.6E-06 |
| rs1040411    |                               | G/A | 0.45 | 0.39 | 1.27 | 3.2E-04 | 0.41 | 0.38 | 1.15 | 2.2E-02 | 6.1E-05 |
| rs633724     |                               | T/C | 0.48 | 0.45 | 1.11 | 1.2E-01 | 0.47 | 0.42 | 1.24 | 4.5E-04 | 4.4E-04 |
| rs7574865*   |                               | T/G | 0.46 | 0.34 | 1.63 | 8.4E-14 | 0.42 | 0.33 | 1.50 | 7.7E-11 | 1.3E-21 |
| rs10168266   |                               | T/C | 0.46 | 0.34 | 1.64 | 4.3E-14 | 0.42 | 0.34 | 1.45 | 2.1E-09 | 2.3E-20 |
| rs7601754*   | <i>STAT4</i>                  | G/A | 0.10 | 0.15 | 0.62 | 4.0E-06 | 0.10 | 0.14 | 0.66 | 1.1E-05 | 6.8E-10 |
| rs16833239   |                               | A/G | 0.07 | 0.11 | 0.57 | 5.4E-06 | 0.07 | 0.10 | 0.62 | 1.5E-05 | 1.2E-09 |
| rs7594501    |                               | A/G | 0.07 | 0.11 | 0.57 | 4.9E-06 | 0.07 | 0.10 | 0.63 | 2.2E-05 | 1.6E-09 |
| rs2230926*** |                               | G/T | 0.06 | 0.02 | 2.71 | 6.9E-11 | 0.08 | 0.04 | 1.74 | 1.4E-05 | 1.4E-13 |
| rs3757173    | <i>TNFAIP3</i>                | C/T | 0.07 | 0.03 | 2.00 | 5.6E-07 | 0.09 | 0.06 | 1.48 | 4.8E-04 | 7.2E-09 |
| rs670369     |                               | C/T | 0.11 | 0.08 | 1.45 | 4.6E-04 | 0.14 | 0.11 | 1.37 | 4.7E-04 | 1.6E-06 |

|              |                             |     |      |      |      |         |      |      |      |         |         |
|--------------|-----------------------------|-----|------|------|------|---------|------|------|------|---------|---------|
| rs619796     |                             | T/C | 0.10 | 0.08 | 1.37 | 3.8E-03 | 0.14 | 0.10 | 1.39 | 3.8E-04 | 9.4E-06 |
| rs774628     |                             | A/G | 0.11 | 0.09 | 1.30 | 1.2E-02 | 0.14 | 0.11 | 1.37 | 5.8E-04 | 4.2E-05 |
| rs2205960*** |                             | T/G | 0.32 | 0.25 | 1.36 | 1.6E-05 | 0.34 | 0.26 | 1.46 | 6.6E-09 | 3.2E-12 |
| rs10489265   |                             | G/T | 0.32 | 0.26 | 1.36 | 1.5E-05 | 0.34 | 0.26 | 1.44 | 2.0E-08 | 7.6E-12 |
| rs1012507    | <i>TNFSF4</i>               | T/G | 0.35 | 0.29 | 1.31 | 8.8E-05 | 0.37 | 0.29 | 1.41 | 8.2E-08 | 1.6E-10 |
| rs704840     |                             | G/T | 0.48 | 0.42 | 1.28 | 1.7E-04 | 0.48 | 0.40 | 1.39 | 4.6E-08 | 1.9E-10 |
| rs844648*    |                             | G/A | 0.46 | 0.51 | 0.84 | 6.9E-03 | 0.46 | 0.54 | 0.74 | 4.3E-07 | 7.9E-08 |
| rs10036748** |                             | C/T | 0.22 | 0.26 | 0.80 | 3.5E-03 | 0.21 | 0.25 | 0.76 | 1.2E-04 | 3.2E-06 |
| rs13168551   |                             | T/C | 0.22 | 0.26 | 0.79 | 2.0E-03 | 0.20 | 0.25 | 0.77 | 3.1E-04 | 4.0E-06 |
| rs4958894    | <i>TNIP1<sup>d</sup></i>    | T/C | 0.34 | 0.40 | 0.79 | 6.1E-04 | 0.32 | 0.37 | 0.81 | 1.1E-03 | 4.6E-06 |
| rs4958893    |                             | T/C | 0.28 | 0.32 | 0.80 | 1.8E-03 | 0.28 | 0.33 | 0.80 | 7.9E-04 | 8.9E-06 |
| rs868641     |                             | A/G | 0.28 | 0.32 | 0.81 | 2.4E-03 | 0.28 | 0.33 | 0.80 | 8.4E-04 | 1.2E-05 |
| rs5754217*** |                             | G/T | 0.41 | 0.44 | 0.89 | 8.7E-02 | 0.46 | 0.53 | 0.75 | 1.2E-06 | 4.9E-06 |
| rs4821112    |                             | G/A | 0.42 | 0.45 | 0.88 | 5.0E-02 | 0.45 | 0.52 | 0.76 | 5.3E-06 | 6.0E-06 |
| rs463426**   | <i>UBE2L3</i>               | C/T | 0.42 | 0.45 | 0.89 | 8.4E-02 | 0.46 | 0.53 | 0.78 | 4.2E-05 | 5.2E-05 |
| rs465500     |                             | G/A | 0.42 | 0.45 | 0.90 | 9.4E-02 | 0.47 | 0.53 | 0.78 | 3.4E-05 | 5.2E-05 |
| rs131654**   |                             | G/T | 0.38 | 0.40 | 0.93 | 2.5E-01 | 0.48 | 0.41 | 1.29 | 2.1E-05 | 1.5E-04 |
| rs3734266    |                             | G/A | 0.19 | 0.13 | 1.56 | 2.0E-07 | 0.18 | 0.12 | 1.54 | 2.3E-07 | 1.2E-12 |
| rs205284     |                             | A/G | 0.18 | 0.12 | 1.63 | 2.6E-08 | 0.16 | 0.11 | 1.51 | 3.2E-06 | 2.8E-12 |
| rs3734261    | <i>UHRF1BP1<sup>e</sup></i> | T/C | 0.18 | 0.12 | 1.60 | 6.6E-08 | 0.16 | 0.11 | 1.50 | 3.2E-06 | 6.2E-12 |
| rs7764921    |                             | A/C | 0.18 | 0.12 | 1.61 | 4.6E-08 | 0.17 | 0.12 | 1.47 | 6.0E-06 | 8.7E-12 |
| rs13205210*  |                             | C/T | 0.19 | 0.13 | 1.57 | 1.8E-07 | 0.17 | 0.12 | 1.49 | 2.7E-06 | 1.2E-11 |

|              |                |     |      |      |      |         |      |      |      |         |         |
|--------------|----------------|-----|------|------|------|---------|------|------|------|---------|---------|
| rs12599402** |                | G/A | 0.37 | 0.44 | 0.78 | 1.3E-04 | 0.36 | 0.42 | 0.81 | 4.9E-04 | 5.4E-07 |
| rs2903692    |                | G/A | 0.31 | 0.35 | 0.84 | 1.5E-02 | 0.30 | 0.34 | 0.83 | 3.7E-03 | 9.0E-05 |
| rs17673553   | <i>CLEC16A</i> | G/A | 0.32 | 0.37 | 0.83 | 5.6E-03 | 0.32 | 0.36 | 0.85 | 1.2E-02 | 1.7E-04 |
| rs9933507    |                | A/G | 0.19 | 0.23 | 0.82 | 1.5E-02 | 0.21 | 0.25 | 0.79 | 1.2E-03 | 2.4E-04 |
| rs12103174   |                | G/A | 0.05 | 0.08 | 0.67 | 4.2E-03 | 0.08 | 0.10 | 0.75 | 8.4E-03 | 3.1E-04 |
| rs1143678*   |                | T/C | 0.03 | 0.02 | 1.84 | 1.9E-03 | 0.01 | 0.00 | 3.09 | 1.3E-02 | 8.7E-05 |
| rs1143683    |                | T/C | 0.03 | 0.02 | 1.84 | 1.9E-03 | 0.01 | 0.00 | 3.09 | 1.3E-02 | 8.6E-05 |
| rs7193268    | <i>ITGAM</i>   | T/C | 0.03 | 0.02 | 1.84 | 1.9E-03 | 0.01 | 0.00 | 3.09 | 1.3E-02 | 8.7E-05 |
| rs9888739    |                | T/C | 0.03 | 0.02 | 1.84 | 2.1E-03 | 0.01 | 0.00 | 3.48 | 1.0E-02 | 7.3E-05 |
| rs9937837    |                | G/T | 0.04 | 0.02 | 1.86 | 6.8E-04 | 0.01 | 0.00 | 3.67 | 3.0E-03 | 7.4E-06 |

\* SNP reported previously in studies based on Hong Kong GWAS <sup>1-5</sup>

\*\* SNP reported previously in studies based on Anhui GWAS <sup>6,7</sup>

\*\*\* SNP reported previously in studies based on Caucasian GWAS <sup>8,9</sup>

a. The Caucasian study reported SNP rs2366293, which has no LD with SNPs listed here based on either HapMap Release22 CEU data or HapMap Release22 CHB&JPT data <sup>8</sup>

b. The Caucasian study reported SNP rs10911363, which has intermediate LD with rs2274064 ( $r^2=0.449$ ) based on HapMap Release22 CEU data,  $r^2=0.386$  based on HapMap Release22 CHB&JPT data <sup>8</sup>

c. The Caucasian study reported SNP rs2245214, which has  $r^2 = 0.934$  with rs633724 based on HapMap Release22 CEU data,  $r^2=0.837$  based on HapMap Release22 CHB&JPT data <sup>9</sup>

d. The Caucasian study reported SNP rs7708392, which has  $r^2=0.906$  with rs10036748 based on HapMap Release22 CEU data,  $r^2=0.835$  based on HapMap Release22 CHB&JPT data <sup>9</sup>

e. The Caucasian study reported SNP rs11755393, which has intermediate LD with rs3734266 ( $r^2=0.374$ ) based on HapMap Release22 CEU data, and  $r^2=0.220$  based on HapMap Release22 CHB&JPT data <sup>5,9</sup>

**Table S2. Meta-analysis Results on Reported Susceptibility Genes ( $1E-4 < p_{meta} < 0.01$ )**

| SNP          | Genes            | A1/A2 | Hong Kong GWAS Results |          |      |         | Anhui GWAS Results |          |      |         | Meta-analysis |
|--------------|------------------|-------|------------------------|----------|------|---------|--------------------|----------|------|---------|---------------|
|              |                  |       | Cases                  | Controls | OR   | p       | Cases              | Controls | OR   | p       | $p_{meta}$    |
| rs4657039    | <i>FCGR2A</i>    | G/A   | 0.31                   | 0.27     | 1.20 | 1.1E-02 | 0.30               | 0.28     | 1.12 | 8.4E-02 | 3.6E-03       |
| rs6696854    |                  | C/T   | 0.33                   | 0.30     | 1.18 | 1.6E-02 | 0.32               | 0.30     | 1.09 | 1.7E-01 | 9.8E-03       |
| rs10800309   |                  | G/A   | 0.33                   | 0.30     | 1.17 | 2.0E-02 | 0.32               | 0.30     | 1.10 | 1.4E-01 | 9.5E-03       |
| rs1801274*** |                  | C/T   | 0.36                   | 0.33     | 1.18 | 1.7E-02 | 0.36               | 0.34     | 1.10 | 1.4E-01 | 8.6E-03       |
| rs2431097    | <i>PTTG1</i>     | A/G   | 0.26                   | 0.24     | 1.11 | 1.7E-01 | 0.26               | 0.21     | 1.32 | 9.0E-05 | 2.2E-04       |
| rs17057846   |                  | A/G   | 0.22                   | 0.20     | 1.15 | 7.4E-02 | 0.24               | 0.20     | 1.26 | 1.2E-03 | 5.1E-04       |
| rs2431099*** |                  | T/C   | 0.31                   | 0.34     | 0.85 | 2.1E-02 | 0.36               | 0.40     | 0.85 | 1.0E-02 | 8.0E-04       |
| rs4921283    |                  | G/A   | 0.34                   | 0.37     | 0.85 | 1.6E-02 | 0.40               | 0.43     | 0.89 | 4.5E-02 | 2.6E-03       |
| rs1862390    |                  | G/A   | 0.35                   | 0.38     | 0.90 | 1.2E-01 | 0.36               | 0.39     | 0.85 | 1.0E-02 | 4.4E-03       |
| rs896126     |                  | C/T   | 0.28                   | 0.32     | 0.83 | 7.5E-03 | 0.28               | 0.31     | 0.86 | 2.0E-02 | 7.1E-04       |
| rs765158     | <i>Lyn</i>       | T/C   | 0.26                   | 0.30     | 0.82 | 7.5E-03 | 0.26               | 0.29     | 0.86 | 2.7E-02 | 9.2E-04       |
| rs6997351    |                  | G/A   | 0.29                   | 0.33     | 0.84 | 1.1E-02 | 0.27               | 0.31     | 0.86 | 1.9E-02 | 1.0E-03       |
| rs11986856   |                  | C/T   | 0.29                   | 0.33     | 0.84 | 1.1E-02 | 0.27               | 0.31     | 0.86 | 1.9E-02 | 1.0E-03       |
| rs7829816*** |                  | G/A   | 0.01                   | 0.02     | 0.69 | 2.2E-01 | 0.03               | 0.02     | 1.02 | 9.3E-01 | 4.6E-01       |
| rs2732547    |                  | A/G   | 0.21                   | 0.23     | 0.88 | 1.1E-01 | 0.22               | 0.26     | 0.80 | 1.4E-03 | 8.2E-04       |
| rs497476     | <i>PDHX-CD44</i> | A/G   | 0.45                   | 0.50     | 0.84 | 9.3E-03 | 0.47               | 0.51     | 0.87 | 2.5E-02 | 8.7E-04       |
| rs2732520    |                  | C/T   | 0.45                   | 0.49     | 0.84 | 6.7E-03 | 0.48               | 0.51     | 0.88 | 3.5E-02 | 9.2E-04       |
| rs2785160    |                  | G/A   | 0.45                   | 0.49     | 0.85 | 9.5E-03 | 0.48               | 0.51     | 0.88 | 3.1E-02 | 1.1E-03       |
| rs2785157    |                  | T/C   | 0.51                   | 0.47     | 1.14 | 4.9E-02 | 0.48               | 0.44     | 1.18 | 6.2E-03 | 1.1E-03       |

|              |             |            |      |      |      |         |      |      |      |         |         |
|--------------|-------------|------------|------|------|------|---------|------|------|------|---------|---------|
| rs2785197*** |             | <i>T/C</i> | 0.21 | 0.23 | 0.88 | 1.0E-01 | 0.22 | 0.26 | 0.80 | 1.3E-03 | 7.7E-04 |
| rs305059     |             | <i>G/A</i> | 0.18 | 0.21 | 0.82 | 1.7E-02 | 0.20 | 0.22 | 0.86 | 4.0E-02 | 2.1E-03 |
| rs10521318   |             | <i>A/G</i> | 0.06 | 0.08 | 0.75 | 3.0E-02 | 0.07 | 0.09 | 0.80 | 3.7E-02 | 2.7E-03 |
| rs2934498    | <i>IRF8</i> | <i>G/A</i> | 0.32 | 0.30 | 1.11 | 1.5E-01 | 0.38 | 0.34 | 1.20 | 4.2E-03 | 2.8E-03 |
| rs419030     |             | <i>T/C</i> | 0.33 | 0.30 | 1.12 | 9.6E-02 | 0.38 | 0.34 | 1.18 | 9.2E-03 | 2.9E-03 |
| rs2280381*** |             | <i>G/A</i> | 0.11 | 0.13 | 0.83 | 7.1E-02 | 0.11 | 0.13 | 0.90 | 2.3E-01 | 3.4E-02 |
| rs13333054   |             | <i>T/C</i> | 0.52 | 0.47 | 1.18 | 9.4E-03 | 0.47 | 0.44 | 1.15 | 1.8E-02 | 6.9E-04 |

---

\* SNP reported previously in studies based on Hong Kong GWAS <sup>1-5</sup>

\*\* SNP reported previously in studies based on Anhui GWAS <sup>6,7</sup>

\*\*\* SNP reported previously in studies based on GWAS on European populations <sup>8-10</sup>

**Table S3. Meta-analysis Results on Reported Susceptibility Genes with  $p_{\text{meta}} > 0.01$  Based on the SNPs Interrogated in Illumina 610 Quad 200Kb Upstream and Downstream of the Reported SNP**

| SNP            | Gene Symbol            | A1/A2 | Hong Kong GWAS Results |          |      |      | Anhui GWAS Results |          |      |      | Meta-analysis     | Previous Report  |                 |         |     |
|----------------|------------------------|-------|------------------------|----------|------|------|--------------------|----------|------|------|-------------------|------------------|-----------------|---------|-----|
|                |                        |       | Cases                  | Controls | OR   | p    | Cases              | Controls | OR   | p    | $p_{\text{meta}}$ | Risk Allele/Freq | OR <sup>b</sup> | p       | REF |
| rs2052401      |                        | T/C   | 0.30                   | 0.31     | 0.95 | 0.44 | 0.30               | 0.33     | 0.90 | 0.09 | 0.09              |                  |                 |         |     |
| rs2241242      |                        | G/A   | 0.31                   | 0.32     | 0.95 | 0.43 | 0.32               | 0.35     | 0.89 | 0.06 | 0.06              |                  |                 |         |     |
| rs2075302      | <i>IFIH1</i>           | C/T   | 0.17                   | 0.15     | 1.15 | 0.10 | 0.16               | 0.15     | 1.09 | 0.31 | 0.07              |                  |                 |         |     |
| rs3788964      |                        | G/A   | 0.31                   | 0.34     | 0.87 | 0.04 | 0.33               | 0.35     | 0.91 | 0.15 | 0.02              |                  |                 |         |     |
| rs1990760***   |                        | T/C   | 0.21                   | 0.19     | 1.16 | 0.07 | 0.21               | 0.20     | 1.03 | 0.72 | 0.14              | T/0.61           | 0.87            | 1.6E-08 | 8   |
| rs6598025      |                        | A/G   | 0.41                   | 0.43     | 0.92 | 0.20 | 0.44               | 0.47     | 0.89 | 0.05 | 0.02              |                  |                 |         |     |
| rs4074794      |                        | C/T   | 0.42                   | 0.44     | 0.92 | 0.20 | 0.43               | 0.45     | 0.92 | 0.16 | 0.06              |                  |                 |         |     |
| rs3758650      | <i>PHRF1</i>           | A/G   | 0.09                   | 0.10     | 0.84 | 0.12 | 0.11               | 0.12     | 0.92 | 0.35 | 0.09              |                  |                 |         |     |
| rs936466       |                        | A/G   | 0.09                   | 0.09     | 0.89 | 0.32 | 0.13               | 0.14     | 0.88 | 0.16 | 0.10              |                  |                 |         |     |
| rs4963128***   |                        | A/G   | 0.07                   | 0.08     | 0.91 | 0.47 | 0.05               | 0.06     | 0.91 | 0.47 | 0.32              | C/0.67           | 0.83            | 4.9E-09 | 9   |
| rs13434020     |                        | G/T   | 0.25                   | 0.24     | 1.08 | 0.31 | 0.24               | 0.22     | 1.13 | 0.09 | 0.06              |                  |                 |         |     |
| rs1127745      |                        | C/T   | 0.25                   | 0.24     | 1.08 | 0.32 | 0.24               | 0.22     | 1.13 | 0.09 | 0.06              |                  |                 |         |     |
| rs9853873      | <i>PXK<sup>a</sup></i> | C/T   | 0.24                   | 0.22     | 1.13 | 0.12 | 0.24               | 0.22     | 1.08 | 0.27 | 0.07              |                  |                 |         |     |
| rs4681690      |                        | G/T   | 0.26                   | 0.25     | 1.05 | 0.47 | 0.25               | 0.24     | 1.10 | 0.19 | 0.16              |                  |                 |         |     |
| rs6445975*/*** |                        | G/T   | 0.17                   | 0.17     | 0.99 | 0.93 | 0.22               | 0.21     | 1.05 | 0.47 | 0.65              | G/0.28           | 1.25            | 7.1E-09 | 9   |
| rs6693578      |                        | C/T   | 0.45                   | 0.41     | 1.17 | 0.02 | 0.50               | 0.48     | 1.07 | 0.26 | 0.02              |                  |                 |         |     |
| rs4844540      | <i>IL10</i>            | G/A   | 0.47                   | 0.43     | 1.17 | 0.02 | 0.51               | 0.49     | 1.07 | 0.26 | 0.02              |                  |                 |         |     |

|              |               |                                      |      |      |      |         |      |      |      |      |      |        |        |         |    |
|--------------|---------------|--------------------------------------|------|------|------|---------|------|------|------|------|------|--------|--------|---------|----|
| rs94872      |               | G/A                                  | 0.49 | 0.44 | 1.22 | 0.00    | 0.37 | 0.36 | 1.02 | 0.76 | 0.02 |        |        |         |    |
| rs2000056    |               | G/A                                  | 0.40 | 0.35 | 1.27 | 0.00    | 0.28 | 0.29 | 0.98 | 0.74 | 0.03 |        |        |         |    |
| rs3024505*** |               | T/C                                  | 0.02 | 0.03 | 0.66 | 0.07    | 0.04 | 0.05 | 0.85 | 0.26 | 0.05 | A/0.16 | 1.19   | 4.0E-08 | 9  |
| rs849142***  |               | monomorphic in HapMap CHB            |      |      |      |         |      |      |      |      | NA#  | T/0.49 | 1.19   | 1.5E-09 |    |
| rs2158622    |               | T/C                                  | 0.09 | 0.10 | 0.92 | 0.49    | 0.11 | 0.14 | 0.79 | 0.01 | 0.02 |        |        |         |    |
| rs122362     | <i>JAZF1</i>  | C/A                                  | 0.10 | 0.12 | 0.82 | 0.07    | 0.11 | 0.12 | 0.88 | 0.19 | 0.03 |        |        |         |    |
| rs10951190   |               | C/T                                  | 0.17 | 0.17 | 1.00 | 0.99    | 0.21 | 0.24 | 0.83 | 0.01 | 0.07 |        |        |         |    |
| rs7456467    |               | A/G                                  | 0.46 | 0.44 | 1.08 | 0.23    | 0.42 | 0.40 | 1.09 | 0.16 | 0.07 |        |        |         |    |
| rs2476601*** |               | A/G A allele with very low frequency |      |      |      |         |      |      |      |      | NA#  | A/0.10 | 1.26   | 3.1E-12 |    |
| rs7545038    |               | A/G                                  | 0.18 | 0.16 | 1.12 | 0.19    | 0.13 | 0.12 | 1.08 | 0.37 | 0.12 |        |        |         |    |
| rs2040041    | <i>PTPN22</i> | T/C                                  | 0.04 | 0.05 | 0.78 | 0.12    | 0.04 | 0.04 | 0.96 | 0.78 | 0.20 |        |        |         |    |
| rs2476599    |               | A/G                                  | 0.04 | 0.05 | 0.80 | 0.15    | 0.04 | 0.04 | 0.96 | 0.79 | 0.23 |        |        |         |    |
| rs1217394    |               | G/A                                  | 0.16 | 0.15 | 1.08 | 0.38    | 0.13 | 0.12 | 1.07 | 0.48 | 0.27 |        |        |         |    |
| rs2304240    |               | A/G                                  | 0.13 | 0.14 | 0.92 | 0.38    | 0.13 | 0.16 | 0.82 | 0.02 | 0.02 |        |        |         |    |
| rs35193259   |               | G/A                                  | 0.20 | 0.22 | 0.90 | 0.17    | 0.25 | 0.27 | 0.88 | 0.06 | 0.02 |        |        |         |    |
| rs12462703   | <i>TYK2</i>   | C/T                                  | 0.20 | 0.22 | 0.90 | 0.17    | 0.25 | 0.27 | 0.88 | 0.06 | 0.02 |        |        |         |    |
| rs280519***  |               | A/G                                  | 0.35 | 0.36 | 0.96 | 0.59    | 0.45 | 0.45 | 0.99 | 0.91 | 0.66 | A/0.47 | NA     | 3.9E-08 | 8  |
| rs2053769    |               | T/C                                  | 0.42 | 0.46 | 0.87 | 3.2E-02 | 0.41 | 0.42 | 0.94 | 0.33 | 0.04 |        |        |         |    |
| rs340639     |               | A/G                                  | 0.44 | 0.48 | 0.87 | 3.4E-02 | 0.42 | 0.42 | 0.97 | 0.57 | 0.07 |        |        |         |    |
| rs340637     | <i>AFF1</i>   | G/A                                  | 0.44 | 0.47 | 0.87 | 4.0E-02 | 0.41 | 0.42 | 0.97 | 0.57 | 0.08 |        |        |         |    |
| rs340630***  |               | G/A                                  | 0.43 | 0.47 | 0.88 | 4.6E-02 | 0.42 | 0.43 | 0.96 | 0.53 | 0.08 | A/0.56 | 0.7937 | 8.3E-09 | 12 |

\* SNP reported previously in studies based on Hong Kong GWAS <sup>1-5,11</sup>

\*\* SNP reported previously in studies based on Anhui GWAS <sup>6,7</sup>

\*\*\* SNP reported previously in studies based on another GWAS <sup>8,9,12</sup>

#NA : Not available

- a. rs2176082 which proved to be associated with SLE in Caucasians, has absolute LD with rs6445975 based on HapMap Release22 CEU data <sup>2</sup>,  $r^2=0.962$  in HapMap CHB+JPT data
- b. ORs were converted to the notion used for our results.  $OR < 1$  indicates that the risk allele is major allele and  $OR > 1$  indicates that the risk allele is minor allele.



**Table S4. Susceptibility SNPs Only Detected in Studies on Asian Populations as of Aug. 2012**

| SNP          | Gene Symbol         | A1/A2 | Hong Kong GWAS Results |          |      |         | Anhui GWAS Results |          |      |          | Meta-analysis     |
|--------------|---------------------|-------|------------------------|----------|------|---------|--------------------|----------|------|----------|-------------------|
|              |                     |       | Cases                  | Controls | OR   | p       | Cases              | Controls | OR   | p        | P <sub>meta</sub> |
| rs1913517*   | <i>WDFY4</i>        | A/G   | 0.33                   | 0.27     | 1.38 | 5.7E-04 | 0.33               | 0.29     | 1.28 | 1.3E-03  | 3.1E-06           |
| rs877819*    | <i>WDFY4</i>        | A/G   | 0.24                   | 0.18     | 1.46 | 1.1E-06 | 0.20               | 0.16     | 1.32 | 3.3E-04  | 8.1E-09           |
| rs4639966**  | <i>DDX6</i>         | G/A   | 0.45                   | 0.42     | 1.12 | 1.9E-01 | 0.34               | 0.28     | 1.39 | 2.4E-05  | 4.8E-05           |
| rs6590330**  | <i>ETS1</i>         | A/G   | 0.44                   | 0.35     | 1.51 | 2.7E-06 | 0.41               | 0.34     | 1.37 | 1.3E-05  | 3.1E-08           |
| rs10893872*  | <i>ETS1</i>         | A/G   | 0.48                   | 0.43     | 1.23 | 1.5E-03 | 0.47               | 0.41     | 1.26 | 1.6E-04  | 1.8E-06           |
| rs10847697** | <i>SLC15A4</i>      | A/G   | 0.23                   | 0.17     | 1.41 | 1.3E-03 | 0.26               | 0.21     | 1.31 | 1.2E-03  | 1.1E-07           |
| rs1385374**  | <i>SLC15A4</i>      | A/G   | 0.23                   | 0.17     | 1.41 | 1.1E-03 | 0.26               | 0.21     | 1.32 | 9.2E-04  | 7.5E-08           |
| rs7329174*   | <i>ELF1</i>         | G/A   | 0.28                   | 0.21     | 1.45 | 4.0E-07 | 0.23               | 0.21     | 1.13 | 1.0E-01  | 6.2E-06           |
| rs7197475**  | <i>ZNF689/PRR14</i> | A/G   | 0.13                   | 0.13     | 1.03 | 8.4E-01 | 0.10               | 0.07     | 1.58 | 6.5E-04  | 1.6E-03           |
| rs13385731** | <i>RASGRP3</i>      | G/A   | 0.13                   | 0.17     | 0.72 | 8.6E-03 | 0.11               | 0.15     | 0.64 | 2.8E-05  | 4.4E-06           |
| rs1167796**  | <i>HIP1</i>         | A/G   | 0.29                   | 0.30     | 0.92 | 4.0E-01 | 0.23               | 0.28     | 0.80 | 4.7E-03  | 8.8E-05           |
| rs704853*    | <i>CD247</i>        | A/C   | 0.17                   | 0.22     | 0.72 | 8.7E-05 | 0.16               | 0.18     | 0.88 | 1.05E-01 | 1.79E-04          |
| rs858543*    |                     | C/T   | 0.52                   | 0.47     | 1.24 | 8.4E-04 | 0.47               | 0.44     | 1.12 | 6.09E-02 | 4.00E-04          |

\* previously published in studies based on Hong Kong GWAS data <sup>3</sup>

\*\* previously published in studies based on Anhui GWAS data <sup>6</sup>

## References

1. Chang, Y.K. *et al.* Association of BANK1 and TNFSF4 with systemic lupus erythematosus in Hong Kong Chinese. *Genes Immun* 10, 414-20 (2009).
2. Yang, W. *et al.* Population differences in SLE susceptibility genes: STAT4 and BLK, but not PXX, are associated with systemic lupus erythematosus in Hong Kong Chinese. *Genes Immun* 10, 219-26 (2009).
3. Yang, W. *et al.* Genome-wide association study in Asian populations identifies variants in ETS1 and WDFY4 associated with systemic lupus erythematosus. *PLoS Genet* 6, e1000841.
4. Yang, W. *et al.* ITGAM is associated with disease susceptibility and renal nephritis of systemic lupus erythematosus in Hong Kong Chinese and Thai. *Hum Mol Genet* 18, 2063-70 (2009).
5. Zhang, Y. *et al.* Two missense variants in UHRF1BP1 are independently associated with systemic lupus erythematosus in Hong Kong Chinese. *Genes Immun* 12, 231-4.
6. Han, J.W. *et al.* Genome-wide association study in a Chinese Han population identifies nine new susceptibility loci for systemic lupus erythematosus. *Nat Genet* 41, 1234-7 (2009).
7. Zhang, Z. *et al.* Polymorphisms at 16p13 are associated with systemic lupus erythematosus in the Chinese population. *J Med Genet* 48, 69-72.
8. Cunninghame Graham, D.S. *et al.* Association of NCF2, IKZF1, IRF8, IFIH1, and TYK2 with systemic lupus erythematosus. *PLoS Genet* 7, e1002341.
9. Gateva, V. *et al.* A large-scale replication study identifies TNIP1, PRDM1, JAZF1, UHRF1BP1 and IL10 as risk loci for systemic lupus erythematosus. *Nat Genet* 41, 1228-33 (2009).
10. Lessard, C.J. *et al.* Identification of a systemic lupus erythematosus susceptibility locus at 11p13 between PDHX and CD44 in a multiethnic study. *Am J Hum Genet* 88, 83-91 (2011).
11. Li, R. *et al.* Association of CD247 with systemic lupus erythematosus in Asian populations. *Lupus* 21, 75-83 (2012).
12. Okada, Y. *et al.* A genome-wide association study identified AFF1 as a susceptibility locus for systemic lupus erythematosus in Japanese. *PLoS Genet* 8, e1002455 (2012).

**Table S5. Detailed Association Information for SNPs Listed in Table 1****Discovery Panel**

| SNP        | A1/A2 | Hong Kong GWAS Results    |          |      |         | Anhui GWAS Results          |          |      |         |
|------------|-------|---------------------------|----------|------|---------|-----------------------------|----------|------|---------|
|            |       | 612 Cases; 2,193 Controls |          |      |         | 1,044 Cases; 1,201 Controls |          |      |         |
|            |       | Cases                     | Controls | OR   | p       | Cases                       | Controls | OR   | p       |
| rs4852324  | C/T   | 0.13                      | 0.19     | 0.63 | 4.4E-07 | 0.21                        | 0.25     | 0.78 | 3.9E-04 |
| rs6705628  | T/C   | 0.10                      | 0.16     | 0.62 | 2.5E-06 | 0.18                        | 0.22     | 0.77 | 5.5E-04 |
| rs6804441  | G/A   | 0.31                      | 0.36     | 0.82 | 3.8E-03 | 0.30                        | 0.34     | 0.80 | 6.5E-04 |
| rs4948496  | T/C   | 0.32                      | 0.38     | 0.78 | 3.8E-04 | 0.34                        | 0.37     | 0.89 | 6.2E-02 |
| rs12822507 | G/A   | 0.39                      | 0.44     | 0.84 | 9.9E-03 | 0.37                        | 0.41     | 0.84 | 3.4E-03 |
| rs10845606 | A/C   | 0.27                      | 0.32     | 0.77 | 2.7E-04 | 0.24                        | 0.28     | 0.83 | 4.9E-03 |
| rs34330    | T/C   | 0.43                      | 0.50     | 0.77 | 8.2E-05 | 0.45                        | 0.47     | 0.91 | 1.3E-01 |
| rs4622329  | G/A   | 0.34                      | 0.39     | 0.82 | 3.2E-03 | 0.40                        | 0.44     | 0.85 | 6.0E-03 |
| rs10911390 | T/C   | 0.12                      | 0.09     | 1.39 | 1.3E-03 | 0.07                        | 0.06     | 1.29 | 3.7E-02 |
| rs1393820  | A/G   | 0.09                      | 0.13     | 0.67 | 2.4E-04 | 0.16                        | 0.18     | 0.85 | 4.9E-02 |
| rs515983   | C/T   | 0.36                      | 0.41     | 0.79 | 6.9E-04 | 0.43                        | 0.46     | 0.88 | 2.8E-02 |
| rs11717455 | C/T   | 0.04                      | 0.06     | 0.56 | 4.3E-04 | 0.06                        | 0.08     | 0.73 | 8.4E-03 |
| rs2023532  | T/C   | 0.12                      | 0.16     | 0.73 | 1.2E-03 | 0.13                        | 0.15     | 0.82 | 2.0E-02 |
| rs2367894  | A/G   | 0.26                      | 0.29     | 0.85 | 3.2E-02 | 0.23                        | 0.28     | 0.79 | 7.2E-04 |
| rs12529935 | T/C   | 0.06                      | 0.08     | 0.72 | 1.2E-02 | 0.09                        | 0.11     | 0.74 | 3.3E-03 |
| rs6957263  | C/T   | 0.13                      | 0.16     | 0.73 | 1.2E-03 | 0.13                        | 0.15     | 0.82 | 1.9E-02 |
| rs2252996  | G/A   | 0.26                      | 0.30     | 0.82 | 6.6E-03 | 0.29                        | 0.32     | 0.87 | 2.9E-02 |
| rs4910907  | G/A   | 0.32                      | 0.27     | 1.25 | 1.4E-03 | 0.27                        | 0.23     | 1.29 | 2.2E-04 |
| rs12917712 | T/C   | 0.43                      | 0.38     | 1.24 | 1.1E-03 | 0.31                        | 0.27     | 1.20 | 6.4E-03 |
| rs12461589 | T/C   | 0.20                      | 0.23     | 0.85 | 4.4E-02 | 0.22                        | 0.27     | 0.76 | 1.0E-04 |

|            |     |      |      |      |         |      |      |      |         |
|------------|-----|------|------|------|---------|------|------|------|---------|
| rs2303745  | A/C | 0.45 | 0.41 | 1.20 | 6.5E-03 | 0.43 | 0.38 | 1.21 | 2.1E-03 |
| rs13333054 | T/C | 0.52 | 0.47 | 1.18 | 9.4E-03 | 0.47 | 0.44 | 1.15 | 1.8E-02 |
| rs2785197  | T/C | 0.21 | 0.23 | 0.88 | 1.0E-01 | 0.22 | 0.26 | 0.80 | 1.3E-03 |

### Replication Panel

| SNP        | A1/A2 | Hong Kong Replication     |          |      | Anhui Replication 1         |          |      | Thailand Replication    |          |      | Anhui Replication 2         |          |      |
|------------|-------|---------------------------|----------|------|-----------------------------|----------|------|-------------------------|----------|------|-----------------------------|----------|------|
|            |       | 793 Cases; 1,063 Controls |          |      | 1,359 Cases; 1,358 Controls |          |      | 453 Cases, 963 Controls |          |      | 1,104 Cases; 3,246 Controls |          |      |
|            |       | Cases                     | Controls | OR   | Cases                       | Controls | OR   | Cases                   | Controls | OR   | Cases                       | Controls | OR   |
| rs4852324  | C/T   | 0.18                      | 0.19     | 0.92 | 0.21                        | 0.26     | 0.75 | 0.13                    | 0.16     | 0.83 | 0.21                        | 0.24     | 0.84 |
| rs6705628  | T/C   | 0.13                      | 0.16     | 0.82 | 0.18                        | 0.23     | 0.77 | 0.10                    | 0.12     | 0.81 | 0.18                        | 0.22     | 0.76 |
| rs6804441  | G/A   | 0.31                      | 0.35     | 0.85 | 0.30                        | 0.34     | 0.87 | 0.28                    | 0.32     | 0.85 | 0.29                        | 0.39     | 0.64 |
| rs4948496  | T/C   | 0.33                      | 0.37     | 0.85 | 0.35                        | 0.38     | 0.88 | 0.31                    | 0.40     | 0.69 | 0.34                        | 0.37     | 0.88 |
| rs12822507 | G/A   | 0.40                      | 0.42     | 0.90 | 0.37                        | 0.39     | 0.90 | 0.41                    | 0.41     | 0.99 | 0.38                        | 0.43     | 0.82 |
| rs10845606 | A/C   | 0.29                      | 0.31     | 0.91 | 0.24                        | 0.30     | 0.73 | 0.31                    | 0.35     | 0.85 | 0.24                        | 0.29     | 0.75 |
| rs34330    | T/C   | 0.43                      | 0.48     | 0.82 | 0.44                        | 0.48     | 0.84 | 0.41                    | 0.45     | 0.83 | 0.43                        | 0.48     | 0.85 |
| rs4622329  | G/A   | 0.38                      | 0.39     | 0.97 | 0.39                        | 0.45     | 0.76 | 0.27                    | 0.35     | 0.70 | 0.41                        | 0.44     | 0.89 |
| rs10911390 | T/C   | 0.11                      | 0.09     | 1.18 | 0.07                        | 0.07     | 1.15 | 0.15                    | 0.13     | 1.13 | 0.07                        | 0.06     | 1.22 |
| rs1393820  | A/G   | 0.12                      | 0.13     | 0.89 | 0.16                        | 0.17     | 0.89 | 0.10                    | 0.12     | 0.80 | 0.16                        | 0.17     | 0.97 |
| rs515983   | C/T   | 0.38                      | 0.41     | 0.87 | 0.44                        | 0.47     | 0.90 | 0.36                    | 0.38     | 0.91 | 0.47                        | 0.46     | 1.02 |
| rs11717455 | C/T   | 0.06                      | 0.07     | 0.73 | 0.07                        | 0.07     | 0.98 | 0.07                    | 0.09     | 0.83 | 0.06                        | 0.07     | 0.82 |
| rs2023532  | T/C   | 0.13                      | 0.14     | 0.90 | 0.12                        | 0.14     | 0.81 | 0.15                    | 0.17     | 0.87 | 0.13                        | 0.14     | 0.96 |
| rs2367894  | A/G   | 0.26                      | 0.27     | 0.95 | 0.24                        | 0.27     | 0.84 | 0.26                    | 0.27     | 0.96 | 0.25                        | 0.26     | 0.97 |
| rs12529935 | T/C   | 0.07                      | 0.08     | 0.97 | 0.08                        | 0.10     | 0.80 | 0.07                    | 0.09     | 0.84 | 0.08                        | 0.09     | 0.86 |
| rs6957263  | C/T   | 0.14                      | 0.18     | 0.77 | 0.14                        | 0.15     | 0.88 | 0.21                    | 0.19     | 1.15 | 0.14                        | 0.15     | 0.88 |

|            |     |      |      |      |      |      |      |      |      |      |      |      |      |
|------------|-----|------|------|------|------|------|------|------|------|------|------|------|------|
| rs2252996  | G/A | 0.26 | 0.28 | 0.87 | 0.29 | 0.30 | 0.95 | 0.31 | 0.30 | 1.01 | 0.28 | 0.32 | 0.83 |
| rs4910907  | G/A | 0.28 | 0.29 | 0.94 | 0.26 | 0.25 | 1.09 | 0.27 | 0.24 | 1.12 | 0.25 | 0.24 | 1.06 |
| rs12917712 | T/C | 0.39 | 0.36 | 1.16 | 0.29 | 0.26 | 1.15 | 0.36 | 0.36 | 1.04 | 0.29 | 0.29 | 1.01 |
| rs12461589 | T/C | 0.20 | 0.23 | 0.87 | 0.25 | 0.25 | 1.03 | 0.16 | 0.19 | 0.80 | 0.24 | 0.26 | 0.93 |
| rs2303745  | A/C | 0.46 | 0.43 | 1.16 | 0.45 | 0.42 | 1.11 | 0.54 | 0.51 | 1.17 | 0.40 | 0.39 | 1.05 |
| rs13333054 | T/C | 0.53 | 0.47 | 1.27 | 0.47 | 0.45 | 1.09 | 0.42 | 0.45 | 0.88 | NA   | NA   | NA   |
| rs2785197  | T/C | 0.21 | 0.22 | 0.97 | 0.21 | 0.24 | 0.82 | 0.24 | 0.24 | 1.00 | 0.22 | 0.26 | 0.81 |

---

**Table S6. Independent Test Results on the Three SNPs in the 12p13 Locus Using Logistic Regression Conditional on the Other Two SNPs**

**A. Results Based on Six Cohorts Used in Both the GWAS and Replication Stages**

| CHR | SNP     | A1 | TEST       | NMISS | OR   | STAT  | p              |
|-----|---------|----|------------|-------|------|-------|----------------|
| 12  | rs34330 | T  | ADD        | 13016 | 0.92 | -2.72 | <b>6.5E-03</b> |
| 12  | rs34330 | T  | rs12822507 | 13016 | 0.90 | -4.36 | <b>1.3E-05</b> |
| 12  | rs34330 | T  | rs10845606 | 13016 | 0.84 | -4.98 | <b>6.3E-07</b> |

p = 6.5E-03 for rs34330 when conditioning on the effect of the other two SNPs, rs12822507 and rs10845606.

p = 1.3E-05 for rs12800507 when conditioning on the effect of the other two SNPs.

p = 6.3E-07 for rs10845606 when conditioning on the effect of the other two SNPs.

**B. Results on Conditional Logistic Regression When Grouping the Samples into Cohorts According to Their Geographical Regions: Hong Kong, Anhui, and Thailand**

| CHR | SNP     | A1 | TEST       | NMISS | OR   | STAT  | p              |
|-----|---------|----|------------|-------|------|-------|----------------|
| 12  | rs34330 | T  | ADD        | 13016 | 0.92 | -2.05 | <b>4.0E-02</b> |
| 12  | rs34330 | T  | rs12822507 | 13016 | 0.90 | -5.03 | <b>5.0E-07</b> |
| 12  | rs34330 | T  | rs10845606 | 13016 | 0.84 | -7.36 | <b>1.9E-13</b> |

NMISS: Number of nonmissing individuals included in analysis

STAT: Coefficient t-statistic

**Table S7. Independent Test Results on the Two SNPs in the *TET3/DGUOK* Region Using Logistic Regression When Conditioning on the Effect of the Other SNP**

**A. Based on the Six Cohorts Used in GWAS and Replication**

| CHR | SNP       | A1 | TEST      | NMISS | OR   | STAT  | p              |
|-----|-----------|----|-----------|-------|------|-------|----------------|
| 2   | rs6705628 | T  | ADD       | 14985 | 0.85 | -2.32 | <b>2.0E-02</b> |
| 2   | rs6705628 | T  | rs4852324 | 14985 | 0.92 | -1.62 | <b>1.1E-01</b> |

**B. Based on Hong Kong, Anhui, and Thai Groups**

| CHR | SNP       | A1 | TEST      | NMISS | OR   | STAT  | p              |
|-----|-----------|----|-----------|-------|------|-------|----------------|
| 2   | rs6705628 | T  | ADD       | 14985 | 0.85 | -6.33 | <b>2.5E-10</b> |
| 2   | rs6705628 | T  | rs4852324 | 14985 | 0.92 | -4.87 | <b>1.1E-06</b> |

NMISS: Number of nonmissing individuals included in analysis

STAT: Coefficient t-statistic

**Table S8. Gene Expression Differences between SLE Patients and Controls on the Genes Identified in This Study**

**A. Expression Profile of Genes Harboring SNPs Reaching Genome-wide Significance**

| Gene Symbol   | CD4 T Cells |        |                      | CD19 B Cells |        |         | Neutrophils/Myeloid Cells |        |                      |
|---------------|-------------|--------|----------------------|--------------|--------|---------|---------------------------|--------|----------------------|
|               | GEO         | Fold   | p Value              | GEO          | Fold   | p Value | GEO                       | Fold   | p Value              |
|               | Accession   | Change |                      | Accession    | Change |         | Accession                 | Change |                      |
| <i>TET3</i>   | GSE4588     | 2.32   | 0.0952               | GSE4588      | 1.32   | 0.4652  | GSE27427                  | N/A    | N/A                  |
|               | GSE10325    | -1.14  | 0.6275               | GSE10325     | 1.08   | 0.7407  | GSE10325                  | 1.38   | 0.2275               |
| <i>CD80</i>   | GSE4588     | 1.43   | 0.2839               | GSE4588      | -1.84  | 0.2876  | GSE27427                  | -2.70  | <b><u>0.0022</u></b> |
|               | GSE10325    | 1.07   | 0.6504               | GSE10325     | -1.17  | 0.1901  | GSE10325                  | -1.01  | 0.9611               |
| <i>ARID5B</i> | GSE4588     | 1.86   | 0.4113               | GSE4588      | 1.12   | 0.8079  | GSE27427                  | 2.46   | <b><u>0.0027</u></b> |
|               | GSE10325    | 1.28   | <b><u>0.0019</u></b> | GSE10325     | -1.14  | 0.1458  | GSE10325                  | 1.10   | 0.8537               |
| <i>CDKN1B</i> | GSE4588     | -1.38  | <b><u>0.0099</u></b> | GSE4588      | -1.01  | 0.9278  | GSE27427                  | 1.05   | 0.5871               |
|               | GSE10325    | -1.11  | 0.1272               | GSE10325     | 1.02   | 0.8231  | GSE10325                  | 1.26   | 0.2716               |
| <i>DRAM1</i>  | GSE4588     | 1.10   | 0.6021               | GSE4588      | 1.21   | 0.1202  | GSE27427                  | N/A    | N/A                  |
|               | GSE10325    | 1.05   | 0.7226               | GSE10325     | 1.02   | 0.8769  | GSE10325                  | 1.57   | <b><u>0.0410</u></b> |
| <i>CREBL2</i> | GSE4588     | -1.22  | 0.0840               | GSE4588      | -1.22  | 0.0575  | GSE27427                  | 1.30   | <b><u>0.0382</u></b> |
|               | GSE10325    | -1.24  | <b><u>0.0027</u></b> | GSE10325     | -1.15  | 0.1279  | GSE10325                  | 1.36   | 0.0838               |
| <i>GPR19</i>  | GSE4588     | 1.03   | 0.9364               | GSE4588      | 2.14   | 0.1983  | GSE27427                  | -2.66  | <b><u>0.0054</u></b> |
|               | GSE10325    | 1.54   | <b><u>0.0154</u></b> | GSE10325     | 1.39   | 0.3622  | GSE10325                  | -1.30  | 0.1150               |

p values < 0.05 were bolded and underlined



## B. Expression Profile of Genes Harboring SNPs with Suggestive Association

| Gene Symbol    | CD4 T Cells      |                |                      | CD19 B Cells     |                |                      | Neutrophils/Myeloid Cells |                |                      |
|----------------|------------------|----------------|----------------------|------------------|----------------|----------------------|---------------------------|----------------|----------------------|
|                | GEO<br>Accession | Fold<br>Change | p Value              | GEO<br>Accession | Fold<br>Change | p Value              | GEO<br>Accession          | Fold<br>Change | p Value              |
| <i>RGL1</i>    | GSE4588          | -1.09          | 0.4426               | GSE4588          | -1.27          | 0.2528               | GSE27427                  | 1.35           | <b><u>0.0309</u></b> |
|                | GSE10325         | -1.25          | 0.0846               | GSE10325         | 0.89           | 0.4042               | GSE10325                  | 3.31           | <b><u>0.0300</u></b> |
| <i>C1D</i>     | GSE4588          | 1.07           | 0.5047               | GSE4588          | -1.01          | 0.9254               | GSE27427                  | 5.99           | <b><u>0.0045</u></b> |
|                | GSE10325         | 1.01           | 0.8837               | GSE10325         | 1.26           | 0.0900               | GSE10325                  | 1.51           | 0.1067               |
| <i>TMEM163</i> | GSE4588          | 1.29           | 0.6192               | GSE4588          | 1.39           | 0.1973               | GSE27427                  | N/A            | N/A                  |
|                | GSE10325         | N/A            | N/A                  | GSE10325         | N/A            | N/A                  | GSE10325                  | N/A            | N/A                  |
| <i>SCN10A</i>  | GSE4588          | 1.16           | 0.6797               | GSE4588          | 1.37           | 0.2591               | GSE27427                  | -1.32          | 0.6403               |
|                | GSE10325         | 1.39           | 0.0606               | GSE10325         | -1.06          | 0.7946               | GSE10325                  | -1.15          | 0.4728               |
| <i>SCN11A</i>  | GSE4588          | 1.19           | 0.5781               | GSE4588          | 1.03           | 0.9474               | GSE27427                  | 1.43           | 0.7325               |
|                | GSE10325         | 1.21           | 0.4921               | GSE10325         | -1.66          | 0.0536               | GSE10325                  | -1.93          | <b><u>0.0284</u></b> |
| <i>UBE2D3</i>  | GSE4588          | 1.05           | 0.2253               | GSE4588          | -1.19          | <b><u>0.0085</u></b> | GSE27427                  | -2.02          | <b><u>0.0024</u></b> |
|                | GSE10325         | 1.04           | 0.5056               | GSE10325         | 1.21           | 0.0510               | GSE10325                  | 1.51           | <b><u>0.0119</u></b> |
| <i>FYB</i>     | GSE4588          | 1.19           | 0.0551               | GSE4588          | 1.19           | 0.4853               | GSE27427                  | -1.10          | 0.5974               |
|                | GSE10325         | -1.41          | 0.1194               | GSE10325         | -1.10          | 0.8714               | GSE10325                  | 2.16           | <b><u>0.0114</u></b> |
| <i>BACH2</i>   | GSE4588          | -1.16          | 0.3827               | GSE4588          | -1.00          | 0.9741               | GSE27427                  | 2.02           | <b><u>0.0158</u></b> |
|                | GSE10325         | -1.44          | <b><u>0.0037</u></b> | GSE10325         | -1.51          | <b><u>0.0069</u></b> | GSE10325                  | -3.93          | 0.2794               |
| <i>PUS7</i>    | GSE4588          | 1.22           | 0.2010               | GSE4588          | 1.06           | 0.7372               | GSE27427                  | -2.78          | 0.1361               |
|                | GSE10325         | 1.24           | <b><u>0.0450</u></b> | GSE10325         | 1.02           | 0.7893               | GSE10325                  | -1.25          | 0.4085               |
| <i>SLC29A3</i> | GSE4588          | 1.24           | 0.4273               | GSE4588          | 1.10           | 0.6004               | GSE27427                  | -4.52          | 0.1410               |
|                | GSE10325         | 1.01           | 0.9628               | GSE10325         | -1.24          | 0.4106               | GSE10325                  | -1.18          | 0.4112               |
| <i>RRM1</i>    | GSE4588          | -1.35          | <b><u>0.0350</u></b> | GSE4588          | 1.02           | 0.8902               | GSE27427                  | 1.06           | 0.7506               |
|                | GSE10325         | -1.12          | 0.3879               | GSE10325         | 1.51           | <b><u>0.0315</u></b> | GSE10325                  | 1.28           | 0.3987               |

|               |          |       |                      |          |       |        |          |       |                      |
|---------------|----------|-------|----------------------|----------|-------|--------|----------|-------|----------------------|
| <i>SEZ6L2</i> | GSE4588  | 1.64  | 0.4670               | GSE4588  | 1.27  | 0.6976 | GSE27427 | -3.78 | 0.0684               |
|               | GSE10325 | 1.01  | 0.9836               | GSE10325 | 1.07  | 0.8180 | GSE10325 | -1.25 | 0.3946               |
| <i>PDCD5</i>  | GSE4588  | 1.39  | <b><u>0.0151</u></b> | GSE4588  | -1.30 | 0.2060 | GSE27427 | 1.22  | 0.4191               |
|               | GSE10325 | 1.01  | 0.8569               | GSE10325 | 1.18  | 0.1395 | GSE10325 | 1.14  | 0.4282               |
| <i>DDA1</i>   | GSE4588  | 1.15  | 0.2072               | GSE4588  | 1.05  | 0.7640 | GSE27427 | 1.14  | 0.1551               |
|               | GSE10325 | -1.04 | 0.7928               | GSE10325 | 1.18  | 0.3715 | GSE10325 | 1.72  | <b><u>0.0019</u></b> |
| <i>IRF8</i>   | GSE4588  | 1.13  | 0.6715               | GSE4588  | -1.02 | 0.7927 | GSE27427 | 2.36  | <b><u>0.0419</u></b> |
|               | GSE10325 | -1.04 | 0.7692               | GSE10325 | -1.28 | 0.1083 | GSE10325 | 1.05  | 0.8012               |
| <i>PDHX</i>   | GSE4588  | 1.10  | 0.2323               | GSE4588  | -1.13 | 0.2232 | GSE27427 | 1.13  | 0.6211               |
|               | GSE10325 | 1.01  | 0.9047               | GSE10325 | 1.26  | 0.0720 | GSE10325 | 1.44  | 0.1315               |
| <i>CD44</i>   | GSE4588  | -1.24 | 0.1473               | GSE4588  | 1.46  | 0.1403 | GSE27427 | -2.20 | 0.0632               |
|               | GSE10325 | -1.24 | 0.1535               | GSE10325 | 1.04  | 0.7433 | GSE10325 | 1.24  | 0.2232               |

p values < 0.05 were **bolded** and underlined
